# Supplementary material
Source: PubMed Central journal article supplement (PMC6139374)
Supplement: NIHMS980555-supplement-8.pdf [file NIHMS980555-supplement-8.pdf]

**Table S1.** Primers were used in this work, related to Figure 1.

| Primer                             | Sequence (5' - 3')                                                              |
|------------------------------------|---------------------------------------------------------------------------------|
| Akt (aa 2-459) cloning Forward (F) | CTTAAGGGATCCATGGACTACAAGGACGACGATGACAAGCTCG                                     |
| Akt (aa 2-459) cloning Reverse (R) | CACCATACTAGTGCATCTCCCGTGTGCACTCCATGCTGTCTTGGTCAGGTGG                            |
| Akt (aa 144-459) cloning F         | CCATCAGGAAAACCTGTATTTTCAGAGCATGAACGAGTTTGTAGTACCTG                              |
| Akt (aa 144-459) cloning R         | GCTTCAGGTACTCAAACCTCGTTCATGCTCTGAAAATACAGGTTTCGTG                               |
| Akt (aa 123-459) cloning F         | GTCCACCATCGGGCGGGATCCATGGGGGCTGAAGAGATGGAGGTGTCC                                |
| Akt (aa 123-459) cloning R         | GGGACACCTCCATCTCTTCAGCCCCATGGATCCGCGCCCGATGGTGGGAC                              |
| Akt-PH domain cloning F            | CAGCGGACATATGAGCGACGTGGCTATTGTGAAGGAGGGTTGGCTGC                                 |
| Akt-PH domain cloning R            | GCCCTACTAGTGCATCTCCCGTGTGCAACCGGAAGTCCATCTCTCTCTCTCTG                           |
| PDK1 cloning F                     | GCTTTAGATCTATGCATCACCATCACCATCACGGTGGCGGTGCCAGGACCACCAGCCAGC                    |
| PDK1 cloning R                     | CAAGAAGAATTCTACTGCACAGCGCGTCCGGTGGCTCTGGTATCGC                                  |
| Insert GST into PDK1 plasmid F     | GTCCACCATCGGGCGGGATCTATGTCCCTATACTAGTTATTGG                                     |
| Insert GST into PDK1 plasmid R     | GGGATCCCCGGAATTCGGGTGCATCACCATCACCATCACCATCACC                                  |
| Akt-K142A,H143A,R144A-F            | GGCTGAAGAGATGGAGGTGTCCCTGGCCAAGCCC <b>GGCGTGCCG</b> TGACCATGAACGAGTTTGTAGTACCTG |
| Akt-K142A,H143A,R144A-R            | CAGGTACTCAAACCTCGTTCATGGTCA <b>GGCAGCGGG</b> GCTTGGCCAGGGACACCTCCATCTCTTCAGCC   |
| Akt-Q218A-F                        | CAGCCCTGAAGTACTCTTT <b>GGC</b> ACCCACGACCGCC                                    |
| Akt-Q218A-R                        | GGCGGTCTGGGT <b>GGC</b> AAAAGTACTTTCAGGGCTG                                     |
| Akt-R144A-F                        | CTGGCCAAGCCCAAGCAC <b>GGCG</b> TGACCATGAACGAGTTTGTAG                            |
| Akt-R144A-R                        | CTCAAACCTCGTTCATGGTCA <b>GGCG</b> GCTTGGGCTTGGCCAG                              |
| Akt-D274A-F                        | GAACGTGGTGTACCGGG <b>GCCT</b> CAAGCTGGAGAACC                                    |
| Akt-D274A-R                        | GGTTCTCAGCTT <b>GGC</b> CGGTACACCAGTTC                                          |
| Akt-K142A,R144A-F                  | GGAGGTGTCCCTGGCCAAGCCC <b>GGC</b> CAC <b>GGCG</b> TGACCATGAACGAG                |
| Akt-142A,R144A-R                   | CTCGTTCATGGTCA <b>GGCG</b> TGGCGGGCTTGGCCAGGGACACCTCC                           |
| Akt-H143A,R144A-F                  | GGAGGTGTCCCTGGCCAAGCCCAAG <b>GGCGCG</b> TGACCATGAACGAG                          |
| Akt-H143A,R144A-R                  | CTCGTTCATGGTCA <b>GGCG</b> GCTTGGGCTTGGCCAGGGACACCTCC                           |
| Akt-Deletion in Linker-F           | CAGTGACAACCTCAGGG* <b>TCCCTGGCCAAGCCCGCCG</b> CTG                               |
| Akt-Deletion in Linker-R           | GGCAGCGGGGGCTTGGCCAGGGA* <b>CCCTGAGTTGTCACTG</b>                                |
| Akt-Insert 6 Glycines in linker-F  | <i>GGGGGGGGGGGGGGGGCTCACCCAGTGACAACCTCAGGG</i>                                  |
| Akt-Insert 6 Glycines in linker-R  | <i>GGGGGGGGGGGGGGGGGGCCCGGACCGGAAGTCCATCTCC</i>                                 |

DNA oligonucleotide primers used for mutagenesis and cloning. Bold indicates mutated bases, underline indicates restriction enzyme sites, italic indicates insertion and \* indicates deletion.

**Table S2.** Amino acid sequence of synthetic peptides used in this study, related to Figure 1.

| ID                                                                         | Sequence                        |
|----------------------------------------------------------------------------|---------------------------------|
| Non-p C tail                                                               | CVDSERRPHFPQFSYSASGTA           |
| 3p-Ser <sup>473</sup> , Ser <sup>477</sup> , Thr <sup>479</sup> C tail     | CVDSERRPHFPQFpSYSApSGpTA        |
| pSer <sup>477</sup> /pThr <sup>479</sup> C tail                            | CVDSERRPHFPQFSYSApSGpTA         |
| pSer <sup>473</sup> C tail                                                 | CVDSERRPHFPQFpSYSASGTA          |
| pSer <sup>477</sup> C tail                                                 | CVDSERRPHFPQFSYSApSGTA          |
| pThr <sup>479</sup> C tail                                                 | CVDSERRPHFPQFSYSASGpTA          |
| S473D C tail                                                               | CVDSERRPHFPQFDYSASGTA           |
| Fluorescein-non-p C tail                                                   | CVDSERfKPHFPQFSYSASGTA          |
| Fluorescein-pSer <sup>473</sup> C tail                                     | CVDSERfKPHFPQFpSYSASGTA         |
| pSer <sup>477</sup> /pThr <sup>479</sup> , Phe472Bpa, H468K(Biotin) C tail | CVDSERRPK(Biotin)FPQBSYSApSGpTA |
| GSK3-Biotin for kinase assay                                               | RSGRARTSSFAEPGGK(Biotin)        |
| GSK3 for crystal                                                           | GRPRTTSFAE                      |
| ATP-GSK3 bisubstrate                                                       | GRPRTT-Dap(ATP)-FAE             |

fK: fluorescein coupled to N- $\epsilon$ -lysine

Dap: L-2,3-diaminopropionic acid

K(Biotin): Biotin coupled to N- $\epsilon$ -lysine

B: p-Benzoyl-L-phenylalanine

**Table S3.** Data collection and refinement statistics (molecular replacement), related to Figures 3 and 4.

|                                                        | AKT1 144-480<br>PDB ID 6BUU | AKT1 123-480<br>PDB ID 6C01 |
|--------------------------------------------------------|-----------------------------|-----------------------------|
| <b>Data collection</b>                                 |                             |                             |
| Space group                                            | p2 <sub>1</sub>             | p2 <sub>1</sub>             |
| Cell dimensions                                        |                             |                             |
| $\alpha, \beta, \gamma$ (Å)                            | 86.62,56.26,<br>91.83       | 86.32,56.09,<br>92.02       |
| $\alpha, \beta, \gamma$ (°)                            | 90.00,105.10,<br>90.00      | 90.00,104.56,<br>90.        |
| Resolution (Å)                                         | 88.67-<br>2.40(2.44-2.40)   | 28.82-<br>2.12(2.17-2.12)   |
| $R_{\text{sym}}$ or $R_{\text{merge}}/R_{\text{meas}}$ | 0.084 (0.18)                | 0.101 (0.76)                |
| $R_{\text{pim}}$                                       | 0.046 (0.11)                | 0.042 (0.31)                |
| $CC1/2$                                                | 0.953                       | 0.996                       |
| $I / \sigma I$                                         | 28.39(3.65)                 | 11.3 (2.0)                  |
| Completeness (%)                                       | 94.40(61.9)                 | 98.50(81.8)                 |
| Total reflections                                      | 96,011                      | 326,363                     |
| Unique reflections                                     | 31,906                      | 48,316                      |
| Redundancy                                             | 3.0(1.9)                    | 6.8 (6.6)                   |
| <b>Refinement</b>                                      |                             |                             |
| Resolution (Å)                                         | 88.67-2.40                  | 89.07-2.12                  |
| No. reflections                                        | 28,033                      | 45,932                      |
| $R_{\text{work}} / R_{\text{free}}$                    | 0.18/0.22<br>(0.21/0.29)    | 0.18/0.23<br>(0.24/0.30)    |
| No. atoms                                              |                             |                             |
| Protein                                                | 5,553                       | 5,558                       |
| Ligand/ion                                             | 6                           | 16                          |
| Water                                                  | 231                         | 504                         |
| $B$ -factors                                           |                             |                             |
| Protein                                                | 39.25                       | 43.4                        |
| Ligand/ion                                             | 39.2                        | 71.2                        |
| Water                                                  | 33.3                        | 45.7                        |
| R.m.s. deviations                                      |                             |                             |
| Bond lengths (Å)                                       | 0.016                       | 0.016                       |
| Bond angles (°)                                        | 0.002                       | 0.002                       |

\*Number of crystals for each structure should be noted in footnote. \*Values in parentheses are for highest-resolution shell. It has 96.86 in preferred regions with 2.04% in allowed regions; no incorrect chiral volumes are detected

**Table S4.** Analysis of MS/MS data by Crossfinder for FL-Akt1Phe472Bpa, pThr<sup>308</sup>, 2pSer<sup>477</sup>,Thr<sup>479</sup> with UV treatment, related to Figure 6.

| ID         | M, calc         | m/z, obs        | charge   | type          | score       | Sequence 1             | Sequence 2    |
|------------|-----------------|-----------------|----------|---------------|-------------|------------------------|---------------|
| 39         | 829.5274        | 415.7703        | 2        | linear        | 909         | SLLSGLLK               |               |
| 18         | 925.5386        | 463.7767        | 2        | linear        | 1172        | HPFLTALK               |               |
| 26         | 974.5108        | 488.2626        | 2        | linear        | 823         | LENLMLDK               |               |
| 43         | 1243.583        | 415.5349        | 3        | linear        | 552         | TFHVETPEER             |               |
| 48         | 1272.606        | 637.3105        | 2        | linear        | 1232        | VTMNEFEYLK             |               |
| 5          | 1346.712        | 449.9113        | 3        | linear        | 509         | DLKLENLMLDK            |               |
| 15         | 1622.825        | 812.4213        | 2        | linear        | 763         | FFAGIVWQHVVYK          |               |
| 9          | 1660.831        | 831.4239        | 2        | linear        | 1377        | EEWTTAIQTVADGLK        |               |
| 50         | 1683.891        | 562.305         | 3        | linear        | 815         | VTMNEFEYLKLLGK         |               |
| 16         | 1750.92         | 438.7379        | 4        | linear        | 750         | FFAGIVWQHVVYK          |               |
| 10         | 1788.926        | 597.3161        | 3        | linear        | 1289        | EEWTTAIQTVADGLK        |               |
| 7          | 1848.886        | 925.4506        | 2        | linear        | 625         | EAPLNNFSVAQCQLMK       |               |
| 8          | 1864.881        | 622.6346        | 3        | linear        | 1016        | EAPLNNFSVAQCQLMK       |               |
| 17         | 1940.952        | 971.4856        | 2        | linear        | 1304        | FYGAEIVSALDYLHSEK      |               |
| <b>36</b>  | <b>1972.914</b> | <b>658.6458</b> | <b>3</b> | <b>linear</b> | <b>1465</b> | <b>RPKFPQbSYSASGTA</b> |               |
| 37         | 2118.974        | 707.3323        | 3        | linear        | 682         | SGSPSDNSGAEMEVS LAKPK  |               |
| 42         | 2445.08         | 816.035         | 3        | linear        | 2033        | TFCGTPEYLAPEVLEDNDYGR  |               |
| <b>399</b> | <b>2594.194</b> | <b>649.5563</b> | <b>4</b> | <b>xlink</b>  | <b>1933</b> | <b>RPKFPQbSYSASGTA</b> | <b>DGATmK</b> |
| <b>403</b> | <b>2594.194</b> | <b>865.7386</b> | <b>3</b> | <b>xlink</b>  | <b>1144</b> | <b>RPKFPQbSYSASGTA</b> | <b>DGATMk</b> |
| <b>400</b> | <b>2610.188</b> | <b>653.555</b>  | <b>4</b> | <b>xlink</b>  | <b>1307</b> | <b>RPKFPQbSYSASGTA</b> | <b>DGATmK</b> |
| <b>404</b> | <b>2610.188</b> | <b>653.555</b>  | <b>4</b> | <b>xlink</b>  | <b>1294</b> | <b>RPKFPQbSYSASGTA</b> | <b>DGATMk</b> |

uncross-linked peptide 1 highlighted red, cross-linked peptide1-peptide 2 highlighted blue

**Table S5.** Analysis of MS/MS data by Crossfinder for FL-Akt1Phe472Bpa, pThr<sup>308</sup>, 2pSer<sup>477</sup>,Thr<sup>479</sup> without UV treatment, related to Figure 6.

| ID        | M, calc         | m/z, obs        | charge   | type          | score       | Sequence 1               | Sequence 2 |
|-----------|-----------------|-----------------|----------|---------------|-------------|--------------------------|------------|
| 18        | 925.5386        | 463.7766        | 2        | linear        | 617         | HPFLTALK                 |            |
| 21        | 952.4689        | 477.2415        | 2        | linear        | 829         | ITDFGLCK                 |            |
| 40        | 957.6224        | 479.8182        | 2        | linear        | 974         | SLLSGLLKK                |            |
| 43        | 1243.583        | 415.535         | 3        | linear        | 779         | TFHVETPEER               |            |
| 49        | 1288.601        | 645.3076        | 2        | linear        | 1354        | VTMNEFEYLK               |            |
| 2         | 1304.655        | 653.3366        | 2        | linear        | 978         | CLQWTTVIER               |            |
| 29        | 1404.769        | 703.3926        | 2        | linear        | 1522        | LFELILMEEIR              |            |
| 30        | 1420.764        | 474.5957        | 3        | linear        | 1185        | LFELILMEEIR              |            |
| 41        | 1498.837        | 500.62          | 3        | linear        | 1635        | TERPRNTFIIR              |            |
| 45        | 1525.908        | 509.6439        | 3        | linear        | 930         | TLGPEAKSLLSGLLK          |            |
| 20        | 1581.761        | 528.2612        | 3        | linear        | 1794        | HRVTMNEFEYLK             |            |
| 15        | 1622.825        | 406.7131        | 4        | linear        | 1502        | FFAGIVWQHVEK             |            |
| 31        | 1626.779        | 407.7019        | 4        | linear        | 833         | LGGGSEDAKEIMQHR          |            |
| 9         | 1660.831        | 554.618         | 3        | linear        | 970         | EEWTTAIQTVADGLK          |            |
| 16        | 1750.92         | 876.4673        | 2        | linear        | 3504        | FFAGIVWQHVEK             |            |
| 10        | 1788.926        | 895.4699        | 2        | linear        | 1198        | EEWTTAIQTVADGLKK         |            |
| 33        | 1801.921        | 601.6483        | 3        | linear        | 689         | LSPPFKPQVTSETDTR         |            |
| 7         | 1848.886        | 925.4509        | 2        | linear        | 1863        | EAPLNNFSVAQCQLMK         |            |
| 8         | 1864.881        | 622.6347        | 3        | linear        | 1294        | EAPLNNFSVAQCQLMK         |            |
| 14        | 1923.006        | 642.0099        | 3        | linear        | 888         | EVIVAKDEVAHTLTENR        |            |
| 17        | 1940.952        | 971.4832        | 2        | linear        | 1810        | FYGAEIVSALDYLHSEK        |            |
| <b>36</b> | <b>1972.914</b> | <b>987.4648</b> | <b>2</b> | <b>linear</b> | <b>1917</b> | <b>RPKFPQBSYSASGTA</b>   |            |
| 37        | 2118.974        | 707.3317        | 3        | linear        | 645         | SGSPSDNSGAEEMEVLAKPK     |            |
| 44        | 2886.404        | 963.1439        | 3        | linear        | 2342        | TFHVETPEEREWTTAIQTVADGLK |            |

uncross-linked peptide 1 highlighted red
